# Supplementary material
Source: HighWire-hosted journal article supplement (https://www.cmajopen.ca/highwire/filestream/88801/field_highwire_adjunct_files/0/open-2021-0336-1-at.pdf)
Supplement: open-2021-0336-1-at.pdf [file open-2021-0336-1-at.pdf]

# Co-Development and Usability Testing of Patient Engagement 101: A Patient-Oriented Research Curriculum in Child Health (PORCCH) E-Learning Module for Healthcare Professionals, Researchers, and Trainees

## Supplemental Digital Content

|                                                                                   |    |
|-----------------------------------------------------------------------------------|----|
| Appendix 1A: Baseline Questionnaire .....                                         | 2  |
| Appendix 1B: Confidence Questionnaire.....                                        | 4  |
| Appendix 1C: Knowledge Test .....                                                 | 5  |
| Appendix 1D: Post-Module Interview Guide.....                                     | 7  |
| Appendix 1E: E-Learning Satisfaction Questionnaire .....                          | 10 |
| Appendix 1F: Additional Usability Feedback and Corresponding Module Changes ..... | 11 |

Appendix 1, as supplied by the authors. Appendix to: Walsh CM, Jones NL, McCreath GA, et al. Codevelopment and usability testing of Patient Engagement 101: a Patient-Oriented Research Curriculum in Child Health e-learning module for health care professionals, researchers and trainees. *CMAJ Open* 2022. doi:10.9778/cmajo.20210336. Copyright © 2022 The Author(s) or their employer(s). To receive this resource in an accessible format, please contact us at [cmajgroup@cmaj.ca](mailto:cmajgroup@cmaj.ca).

## Appendix 1A: Baseline Questionnaire

### Baseline Questionnaire

1. You are a: ☐ Child ☐ Caregiver/parent ☐ Child health clinician  
☐ Child health researcher ☐ Child health clinician researcher  
☐ Child health clinical trainee ☐ Child health research trainee ☐ Other

2. Please describe your research field/discipline and/or clinical profession/specialty: \_\_\_\_\_

3. Age (if < 25 years old): \_\_\_\_\_

4. Sex: ☐ Male ☐ Female

5. Institution and/or City in which you live: \_\_\_\_\_

6. List the languages you are able to understand, speak, read and/or write. For each language rate your ability on a 1 (basic ability) to 5 (fluent) scale:

| Language<br>(please list) | Understanding<br>(circle one) | Speaking<br>(circle one) | Reading<br>(circle one) | Write<br>(circle one) |
|---------------------------|-------------------------------|--------------------------|-------------------------|-----------------------|
| English                   | 1 2 3 4 5                     | 1 2 3 4 5                | 1 2 3 4 5               | 1 2 3 4 5             |
|                           | 1 2 3 4 5                     | 1 2 3 4 5                | 1 2 3 4 5               | 1 2 3 4 5             |
|                           | 1 2 3 4 5                     | 1 2 3 4 5                | 1 2 3 4 5               | 1 2 3 4 5             |
|                           | 1 2 3 4 5                     | 1 2 3 4 5                | 1 2 3 4 5               | 1 2 3 4 5             |

7. Please check your **highest** education level (or the approximate equivalent to a degree obtained in another country):

- ☐ Elementary school (specify grade: \_\_\_\_\_)  
☐ Less than high school (specify grade: \_\_\_\_\_)  
☐ High School  
☐ Professional training  
☐ Some college or university  
☐ College  
☐ University  
☐ Masters  
☐ MD, PhD, JD  
☐ Other (please specify: \_\_\_\_\_)

8. Have you engaged in patient-oriented research previously? ☐ Yes ☐ No

If yes, please explain nature of engagement: \_\_\_\_\_

9. Please rate your knowledge regarding patient-oriented research:

- ☐ 1 (I don't know anything about patient-oriented research) ☐ 2 ☐ 3 ☐ 4 ☐ 5 (extremely knowledgeable)

10. Have you used e-learning before (online interactive learning?) ☐ Yes ☐ No

11. Please rate your comfort in using a computer:

☐ 1 (don't know how to use a computer) ☐ 2 ☐ 3 ☐ 4 ☐ 5 (extremely comfortable)

12. Please rate your comfort in using the internet:

☐ 1 (don't know how to use the internet) ☐ 2 ☐ 3 ☐ 4 ☐ 5 (extremely comfortable)

## Confidence Questionnaire

*Rate your degree of confidence by recording a number from 0 to 100 using the scale given below:*

|                     |    |    |    |    |                      |    |    |    |    |                          |
|---------------------|----|----|----|----|----------------------|----|----|----|----|--------------------------|
| 0                   | 10 | 20 | 30 | 40 | 50                   | 60 | 70 | 80 | 90 | 100                      |
| Cannot<br>do at all |    |    |    |    | Moderately<br>can do |    |    |    |    | Highly certain<br>can do |

|                                                                                                                                                   | Confidence<br>(0 – 100) |
|---------------------------------------------------------------------------------------------------------------------------------------------------|-------------------------|
| <b>Patient Engagement 101, Part 1: Foundations of Patient Engagement</b>                                                                          |                         |
| 1. I understand what patient-oriented child health research is                                                                                    | _____                   |
| 2. I can describe some of the ways that patient engagement can lead to higher quality research                                                    | _____                   |
| 3. I understand the values and goals of patient engagement in health research                                                                     | _____                   |
| 4. I am familiar with the key principles of meaningful and sustainable patient engagement                                                         | _____                   |
| 5. I understand how to assess readiness for patient engagement among patients and families as well as researchers                                 | _____                   |
| 6. I am familiar with the spectrum of patient engagement and how the time and resources required for engagement increase along the spectrum       | _____                   |
| <b>Patient Engagement 101, Part 2: Patient Engagement in Practice</b>                                                                             |                         |
| 1. I can describe some of the key elements of a patient engagement plan                                                                           | _____                   |
| 2. I can describe ways in which to engage patients and families at different stages of the research process                                       | _____                   |
| 3. I understand the importance of planning for patient engagement at the beginning of a research study                                            | _____                   |
| 4. I can describe some of the positive impacts that patient engagement can have for the research project, for the research team, and for partners | _____                   |
| 5. I can describe some of the unique challenges of patient engagement and how they can be overcome                                                | _____                   |
| 6. I am familiar with the spectrum of patient engagement as well as various methods of engagement along the spectrum                              | _____                   |

**Knowledge Test**

**Patient Engagement 101, Part 1: Foundations of Patient Engagement**

Please select the answer you believe is correct for each of the following statements.

- |    |                                                                                                                             |      |       |
|----|-----------------------------------------------------------------------------------------------------------------------------|------|-------|
| 1) | INVOLVE, PCORI, and SPOR are initiatives to promote patient engagement in health research                                   | TRUE | FALSE |
| 2) | Patient engagement typically reduces the cost and resources required for a research project                                 | TRUE | FALSE |
| 3) | Patient engagement helps focus research on topics of importance to patients                                                 | TRUE | FALSE |
| 4) | Key principles of patient engagement include inclusiveness, mutual respect, and co-production                               | TRUE | FALSE |
| 5) | Meaningful patient engagement includes research projects that involve patients but do not reflect their contributions       | TRUE | FALSE |
| 6) | As the depth of patient engagement increases, more time and knowledge are required of both patient partners and researchers | TRUE | FALSE |

Match the following levels of patient engagement to the correct description:  
a) consultation, b) involvement, c) collaboration.

- |    |                                                                                   |       |
|----|-----------------------------------------------------------------------------------|-------|
| 7) | Patient and families partner with researchers on all aspects of the research      | _____ |
| 8) | Patients and families provide input on specific research issues via a focus group | _____ |
| 9) | Patients and families work directly with the research team throughout the project | _____ |

## **Knowledge Test**

### **Patient Engagement 101, Part 2: Patient Engagement in Practice**

**Please select the answer you believe is correct for each of the following statements.**

- |    |                                                                                                                                |             |              |
|----|--------------------------------------------------------------------------------------------------------------------------------|-------------|--------------|
| 1) | There are no definitive studies on the best patient engagement methods                                                         | <b>TRUE</b> | <b>FALSE</b> |
| 2) | Formal patient engagement plans are often unnecessary                                                                          | <b>TRUE</b> | <b>FALSE</b> |
| 3) | Tools to evaluate important dimensions of patient engagement activities have not yet been developed                            | <b>TRUE</b> | <b>FALSE</b> |
| 4) | GRIPP2 is an example of a checklist to improve the reporting of patient and public involvement in research                     | <b>TRUE</b> | <b>FALSE</b> |
| 5) | Acknowledging the expertise of patients and families' lived experience is an important aspect of changing the research culture | <b>TRUE</b> | <b>FALSE</b> |
| 6) | Developing collaborative ways of working together helps avoid tokenism in patient engagement                                   | <b>TRUE</b> | <b>FALSE</b> |
| 7) | Patients and families most often have the same motivations as researchers for engaging in health research                      | <b>TRUE</b> | <b>FALSE</b> |
| 8) | Multiple patient engagement methods from across the spectrum of patient engagement can be used within the same study           | <b>TRUE</b> | <b>FALSE</b> |

### **POST-MODULE INTERVIEW**

**\*\*You do not have to ask a question if it was addressed during module completion\*\***

- Was the information provided in the modules helpful to you? **(Usefulness)**
  - *What did you find the most useful?*
  - *What did you find least useful?*
- Was there any information that you thought should be in the module but was not there? **(Gaps in information)**
  - *Is there anything you would suggest to add to the e-learning module to make it better?*
  - *Was there any information missing from the module?*
- How much did the module keep your attention as you were going through it? **(Engagement)**
  - *What parts did you pay the most attention to, and why?*
  - *What parts did you pay the least attention to, and why?*
- What parts of the module do you remember the most? **(Memorability)**
  - *What is the main thing you remember about the module?*
  - *What is the main thing you learned that stands out?*
- What parts of the module do you remember the least? **(Memorability)**
  - *Is there anything you are now more confused about?*
- Can you tell me what you liked best about the module? **(Satisfaction, Liked or disliked)**
  - *Information, layout, animations, graphics, etc.?*
  - *Can you tell more about that?*
- Can you tell me what you liked least about the module? **(Satisfaction, Liked or disliked)**
  - *Information, layout, animations, graphics etc.?*
  - *Can you tell more about that?*
- What did you think about the length of the module? **(Efficiency of use)**
  - *Do you think the module should be longer, shorter, or was it just right?*
  - *Why do you think so?*
- Can you tell me about how easy it was to navigate or find your way around the module? **(Learnability, Ease of use, Gaps in functionality)**
  - *What were the challenges of navigating through the module?*
  - *What would make it easier to navigate through the module?*
  - *What changes would make the module easier to use?*
  - *Were there sections of the e-learning module that you found particularly easy to use?*
    - *What about them made them easy to use?*
  - *Were there sections of the e-learning module that you found particularly hard to use?*
    - *What about them made them hard to use?*

- Can you tell me about what you thought about the overall look of the module? **(Aesthetics)**
  - *For example, the design, colours, and images in the module.*
  - *Does the module feel warm and friendly or cold and technical?*
  - *Can you tell me more about that?*
  - *Do you think it is visually appealing?*
  - *What would make the module more visually appealing?*
- Was the module easy to understand? **(Ease of understanding)**
  - *What did you find easy to understand?*
  - *What did you find difficult to understand?*
- Was the content easy to read? **(Aesthetics, Ease of understanding)**
  - *What did you think of the font?*
  - *What did you think of the amount of text?*
- Did the person talking present information too quickly, or too slowly, or was it just right? **(Ease of understanding)**
  - *What did you think about the pace of the module?*
  - *Were you able to understand what the speaker was saying?*
- Can you tell me what you thought about the information provided in the module? **(Information, Content, Learnability)**
  - *Was the information in the module clearly presented?*
  - *Was it easy to follow along with the audio and writing together?*
- What do you think about the amount of information that was provided? **(Gaps in information)**
  - *Was there too much information? Too little? Or was it just right?*
  - *How much of the information presented in the module did you already know before completing the module?*
- How do you feel about the accuracy of the information? **(Trustworthiness of information)**
  - *How much do you believe the information provided is true?*
  - *Is there anything you disagree with? Can you specify what/where?*
- If you could make changes to the module, what changes would you make? **(Would like to change/add)**
  - *Can you tell me more about that?*
  - *If you look through these slides (print copy) does anything come to mind?*
- What other things could help you to support what you learned through the module **(Gaps in information)**
  - *Do you think a handout would be helpful? A website? An app?*



- Overall, how satisfied were you with the modules? **(Subjective satisfaction)**
  - *Is there anything you would suggest changing to make the e-learning module better?*
- Can you tell me about whether or not you would use this module to learn more about patient-oriented child health research? **(Usefulness)**
  - *What section of the module would you refer back to, if any?*
- What would motivate you to use the module? **(Motivation)**
- Would you access this module from home if it was made available? **(Motivation)**
- Can you tell me about whether or not you think others would be interested in using this module? **(Usefulness)**
  - *Who would this be most useful for?*
  - *Would you recommend this module others? If so, who? Can you tell me more about that?*
- What would make it easier to motivate others to use the module? **(Motivation)**
  - *What would interest them in using this program?*
- Is there anything else you would like to tell us about the module? **(Other)**
  - *Can you tell me more about that?*

## Appendix 1E: E-Learning Satisfaction Questionnaire

### E-Learning Satisfaction Questionnaire

With regard to the E-Learning Education you just received, please indicate your level of agreement with each question below by marking a number between 1 (low agreement) and 5 (high agreement)

|                                                                     | Low<br>agreement           |                            |                            |                            | High<br>agreement          |
|---------------------------------------------------------------------|----------------------------|----------------------------|----------------------------|----------------------------|----------------------------|
| I learned something new                                             | <input type="checkbox"/> 1 | <input type="checkbox"/> 2 | <input type="checkbox"/> 3 | <input type="checkbox"/> 4 | <input type="checkbox"/> 5 |
| The information I received was easy to understand                   | <input type="checkbox"/> 1 | <input type="checkbox"/> 2 | <input type="checkbox"/> 3 | <input type="checkbox"/> 4 | <input type="checkbox"/> 5 |
| I received the right amount of information                          | <input type="checkbox"/> 1 | <input type="checkbox"/> 2 | <input type="checkbox"/> 3 | <input type="checkbox"/> 4 | <input type="checkbox"/> 5 |
| My questions were answered                                          | <input type="checkbox"/> 1 | <input type="checkbox"/> 2 | <input type="checkbox"/> 3 | <input type="checkbox"/> 4 | <input type="checkbox"/> 5 |
| The goals of the session were clear                                 | <input type="checkbox"/> 1 | <input type="checkbox"/> 2 | <input type="checkbox"/> 3 | <input type="checkbox"/> 4 | <input type="checkbox"/> 5 |
| The length of time it took to finish the e-learning module was good | <input type="checkbox"/> 1 | <input type="checkbox"/> 2 | <input type="checkbox"/> 3 | <input type="checkbox"/> 4 | <input type="checkbox"/> 5 |
| The e-learning module was easy to use                               | <input type="checkbox"/> 1 | <input type="checkbox"/> 2 | <input type="checkbox"/> 3 | <input type="checkbox"/> 4 | <input type="checkbox"/> 5 |

### OVERALL

Please indicate your level of agreement with each question below by marking a number between 1 (not at all) and 5 (very)

|                                                      | Not<br>at all              |                            |                            |                            | Very                       |
|------------------------------------------------------|----------------------------|----------------------------|----------------------------|----------------------------|----------------------------|
| Overall, how SATISFIED were you with your education? | <input type="checkbox"/> 1 | <input type="checkbox"/> 2 | <input type="checkbox"/> 3 | <input type="checkbox"/> 4 | <input type="checkbox"/> 5 |
| Overall, how ENJOYABLE was your education?           | <input type="checkbox"/> 1 | <input type="checkbox"/> 2 | <input type="checkbox"/> 3 | <input type="checkbox"/> 4 | <input type="checkbox"/> 5 |

## Appendix 1F: Additional Usability Feedback and Corresponding Module Changes

| Topic                                                                                     | Quote                                                                                                                                                                                                                                                                                                                  | Corresponding Module Change(s)                                                                                                                                            |
|-------------------------------------------------------------------------------------------|------------------------------------------------------------------------------------------------------------------------------------------------------------------------------------------------------------------------------------------------------------------------------------------------------------------------|---------------------------------------------------------------------------------------------------------------------------------------------------------------------------|
| <b>Content</b>                                                                            |                                                                                                                                                                                                                                                                                                                        |                                                                                                                                                                           |
| <b>Completeness:</b> extent to which the module content contained all desired information | “I would also think that building these patient engagement activities into grants would be something to consider, especially when you think about compensation.” (P8, C1)                                                                                                                                              | Added an additional suggestion for ways to address operational issues in authentic patient engagement: include engagement expenses in your budget and grant applications. |
|                                                                                           | “The other thing you can maybe add to this if you want another advantage of patient-oriented research is the enthusiasm you get from involving other people.” (P15, C1)                                                                                                                                                | Added “increased enthusiasm for the research” as another value-add of partnering with patients and families in child health research.                                     |
| <b>Relevance:</b> the relevance of the module to its intended users                       | “It’s funny, I’m surprised the module is so alive with my own experience.” (P4, C1)                                                                                                                                                                                                                                    |                                                                                                                                                                           |
|                                                                                           | “This [Assessing readiness for patient engagement] section [...] has both the family’s point of view and the researcher’s point of view [...], so if patients look through the module, they see your point of view, and if you look through the module, you see their point of view—I find it very helpful.” (P13, C1) |                                                                                                                                                                           |
| <b>Learner Experience</b>                                                                 |                                                                                                                                                                                                                                                                                                                        |                                                                                                                                                                           |
| <b>Preference for information access:</b> users’ preferences regarding information access | “If there was an additional resource that was in the module, but I didn’t save it, could I just go back to the website to find it quickly without going back into the module?” (P4, C1)                                                                                                                                | Added a table containing all additional resources files for Patient Engagement 101 on the PORCCH website.                                                                 |
| <b>Design Aesthetic</b>                                                                   |                                                                                                                                                                                                                                                                                                                        |                                                                                                                                                                           |
| <b>Features:</b> interactive elements of the module                                       | “This one has tick boxes. Can you click more than one?” (P14, C1)                                                                                                                                                                                                                                                      | Added an explicit “select all that apply” instruction for the checkbox-style knowledge check questions.                                                                   |
| <b>Layout:</b> the arrangement of text and graphics on slides                             | “The ‘select your answer’ prompt is pointing towards the [true response]—it’s kind of guiding respondents.” (P10, C1)                                                                                                                                                                                                  | Ensured that all prompts on the true or false knowledge check questions were neutrally positioned.                                                                        |
| <b>Navigation:</b> the ability of the user to easily move around the module               | I like how it links me back to that main page, like now you’re done with that [section] so now you’re moving onto the next one.” (P28, C2)                                                                                                                                                                             |                                                                                                                                                                           |

Abbreviations: P: Participant; C: usability cycle.
